# Supplementary material for: Highly Fluorinated Methacrylates for Optical 3D Printing of Microfluidic Devices
Source: PubMed Central journal article supplement (PMC6187856; doi:10.3390/mi9030115), 2018-03-08
Supplement: micromachines-09-00115-s001.pdf [file micromachines-09-00115-s001.pdf]

# Supplementary Materials: Highly Fluorinated Methacrylates for Optical 3D Printing of Microfluidic Devices

Frederik Kotz, Patrick Risch, Dorothea Helmer and Bastian E. Rapp

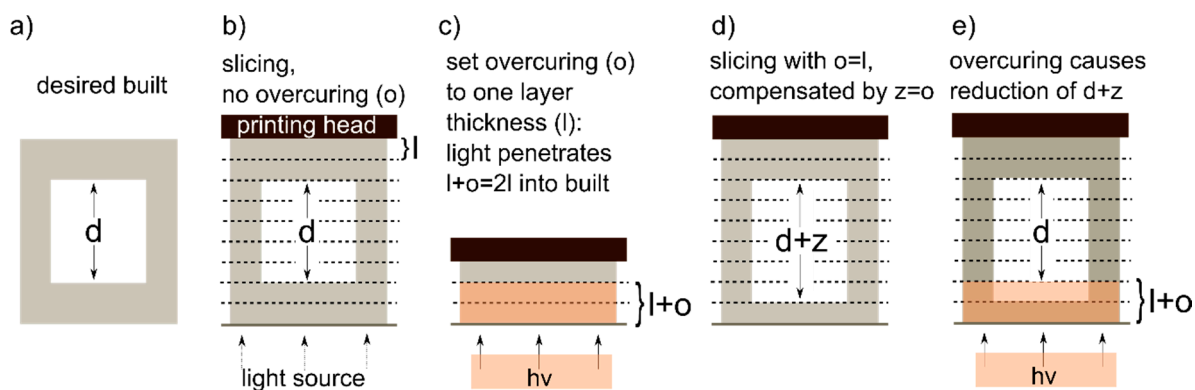

**Figure S1.** Overcuring and z-compensation of the Asiga Pico 2 printer: (a) Initial CAD file; (b) Slicing of the CAD file without the overcuring effect. The sliced CAD file has the same dimension like the initial CAD file; (c) Overcuring ( $l+o$ ) is needed to prevent the slices from delamination during the printing process; (d) During the slicing process the overcuring is taken into account by the so called z-compensation. The shown sliced channel structure is higher than the initial CAD file; (e) The difference is polymerized by the overcuring during the printing process. The printed channel has the height of the initial CAD file.

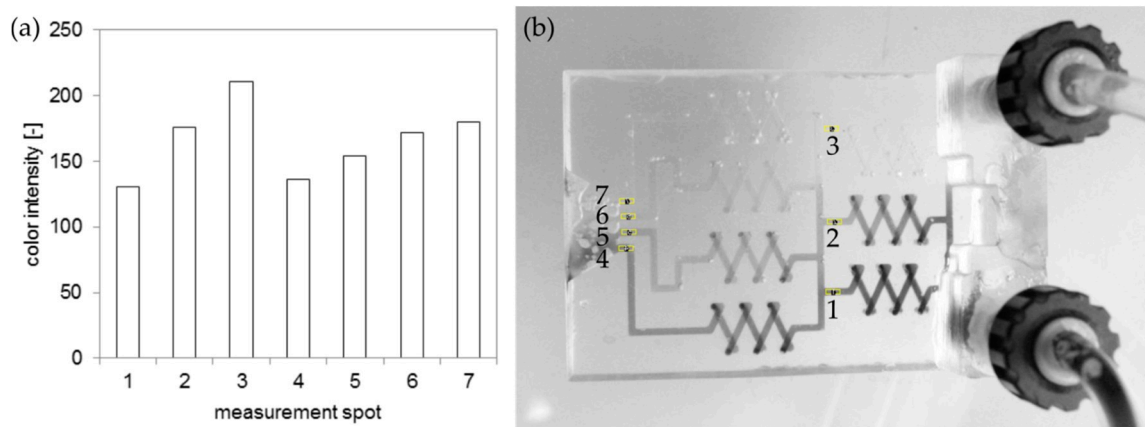

**Figure S2.** Determination of the color intensity in a PFPE-printed microfluidic channel (800  $\mu\text{m}$  channel height and width) at different mixing positions: (a) The color intensity  $((\text{red}+\text{green}+\text{blue})/3)$  at different measurement spots shows the gradient generation in the microfluidic chip; (b) Greyscale image of the microfluidic chip showing the position of the measurement spots.
